# Supplementary material
Source: PubMed Central journal article supplement (PMC3236085)
Supplement: NIHMS172191-supplement-1_si_001.pdf [file NIHMS172191-supplement-1_si_001.pdf]

### Supplemental Figure Caption

**Figure S1.** Population distributions of  $\text{Ca}^{2+}$  levels. Bars show the percentage of cells showing greater than 3x the  $\text{Ca}^{2+}$  of untransfected, prestimulation cells.  $\text{Ca}^{2+}$  levels (Fluo-4 fluorescence) were normalized to the average prestimulation  $\text{Ca}^{2+}$  level in untransfected cells for each experiment as in Figure 3. Distributions of  $\text{Ca}^{2+}$  levels in A) unstimulated cells, and B) cells after 10 min. in the presence of 150 nM thapsigargin. Cells scored in each sample were transfected with a pair of wild type or mutant STIM1 and Orai1. Each STIM1/Orai1 pair represents 20-60 cells, and error bars show SE.

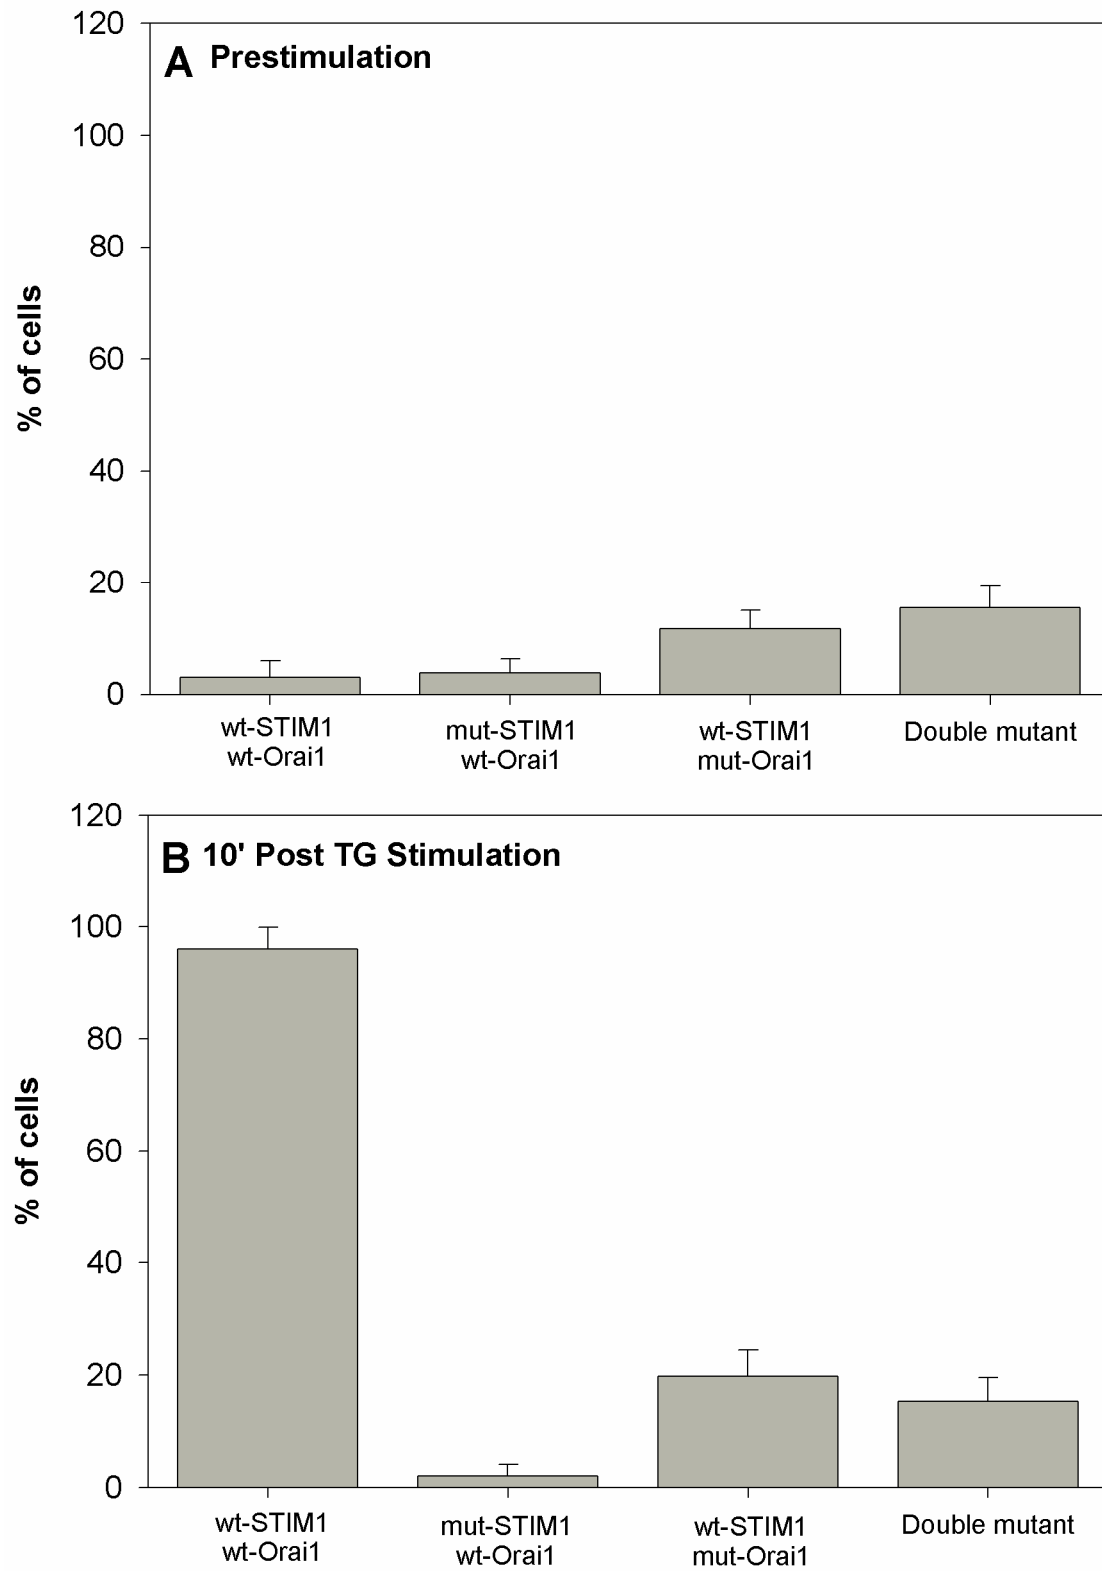

Figure S1
